# Supplementary material for: Head and eyes: Looking behavior in 12- to 24-month-old infants
Source: PubMed Central journal article supplement (PMC8375006; doi:10.1167/jov.21.8.18), 2021-08-17
Supplement: jovi-21-8-18_s001.pdf [file jovi-21-8-18_s001.pdf]

| <b>Age</b>     | <b>Long Look</b>      | <b>Short Look</b>     |
|----------------|-----------------------|-----------------------|
| 12 Months      | 10.957 (2.518)        | 11.790 (2.426)        |
| 15 Months      | 12.314 (2.821)        | 12.376 (2.783)        |
| 18 Months      | 11.501 (2.472)        | 12.549 (1.938)        |
| 21 Months      | 10.895 (2.111)        | 11.739 (1.653)        |
| 24 Months      | 11.628 (2.105)        | 13.333 (2.025)        |
| <b>Overall</b> | <b>11.550 (2.409)</b> | <b>12.471 (2.212)</b> |

**Supplementary Table 1.** *Distance to the center of the head camera image for the data plotted in Figure 3.* For each age level, the median distance to the center of the head camera image for each age level and for both short and long looks is provided with standard deviations in parentheses.

| Age            | Count           |                  |                |                |                | Proportion      |                  |               |
|----------------|-----------------|------------------|----------------|----------------|----------------|-----------------|------------------|---------------|
|                | 0-10°<br>Radius | 10-20°<br>Radius | Inside<br>20°  | Outside<br>20° | Total          | 0-10°<br>Radius | 10-20°<br>Radius | Inside<br>20° |
| 12 Months      | 52,082          | 52,408           | 104,490        | 23,360         | 127,850        | 0.407           | 0.410            | 0.817         |
| 15 Months      | 38,250          | 51,842           | 90,092         | 28,188         | 118,280        | 0.323           | 0.438            | 0.762         |
| 18 Months      | 44,414          | 57,067           | 101,481        | 33,057         | 134,538        | 0.330           | 0.424            | 0.754         |
| 21 Months      | 65,027          | 79,074           | 144,101        | 30,058         | 174,159        | 0.373           | 0.454            | 0.827         |
| 24 Months      | 55,810          | 81,190           | 137,000        | 43,847         | 180,847        | 0.309           | 0.449            | 0.758         |
| <b>Overall</b> | <b>255,583</b>  | <b>321,581</b>   | <b>577,164</b> | <b>158,510</b> | <b>735,674</b> | <b>0.347</b>    | <b>0.437</b>     | <b>0.785</b>  |

**Supplementary Table 2.** Breakdown of data plotted in the kernel density estimates in Figure 3. For each age level, the amount of data within each of the circles plotted in Figures 2a and 2b as well as the proportion of data that falls in each circle.

| <b>Age</b>     | <b>0.5 – 1.<br/>sec</b> | <b>1.0 – 1.5<br/>sec</b> | <b>1.5 – 2.0<br/>sec</b> | <b>2.0 – 2.5<br/>sec</b> | <b>2.5 – 3.0<br/>sec</b> | <b>3.0 – 3.5<br/>sec</b> | <b>3.5 – 4.0<br/>sec</b> | <b>4.0 – 4.5<br/>sec</b> |
|----------------|-------------------------|--------------------------|--------------------------|--------------------------|--------------------------|--------------------------|--------------------------|--------------------------|
| 12 Months      | 441                     | 286                      | 185                      | 132                      | 105                      | 81                       | 58                       | 43                       |
| 15 Months      | 591                     | 358                      | 194                      | 137                      | 109                      | 84                       | 58                       | 40                       |
| 18 Months      | 782                     | 474                      | 268                      | 156                      | 122                      | 65                       | 57                       | 37                       |
| 21 Months      | 983                     | 497                      | 299                      | 196                      | 136                      | 98                       | 62                       | 46                       |
| 24 Months      | 1,316                   | 713                      | 338                      | 227                      | 118                      | 106                      | 80                       | 58                       |
| <b>Overall</b> | <b>4,113</b>            | <b>2,328</b>             | <b>1,284</b>             | <b>848</b>               | <b>590</b>               | <b>434</b>               | <b>315</b>               | <b>224</b>               |
| 12 Months      | 0.331                   | 0.215                    | 0.139                    | 0.099                    | 0.079                    | 0.061                    | 0.044                    | 0.032                    |
| 15 Months      | 0.376                   | 0.228                    | 0.123                    | 0.087                    | 0.069                    | 0.053                    | 0.037                    | 0.025                    |
| 18 Months      | 0.399                   | 0.242                    | 0.137                    | 0.080                    | 0.062                    | 0.033                    | 0.029                    | 0.019                    |
| 21 Months      | 0.424                   | 0.215                    | 0.129                    | 0.085                    | 0.059                    | 0.042                    | 0.027                    | 0.020                    |
| 24 Months      | 0.445                   | 0.241                    | 0.114                    | 0.077                    | 0.004                    | 0.036                    | 0.027                    | 0.020                    |

**Supplementary Table 3.** *Breakdown of data plotted in Figure 5.* For each age level, the number of looks within each bin for each age level across all participants (at top) and the proportion of looks within each bin normalized for each age group.
